# Supplementary figures and images for: Preserving Ambulation in a Gene Therapy-Treated Girl Affected by Metachromatic Leukodystrophy: A Case Report
Source: MDPI journal article supplement (doi:10.3390/jpm13040637), 2023-04-06

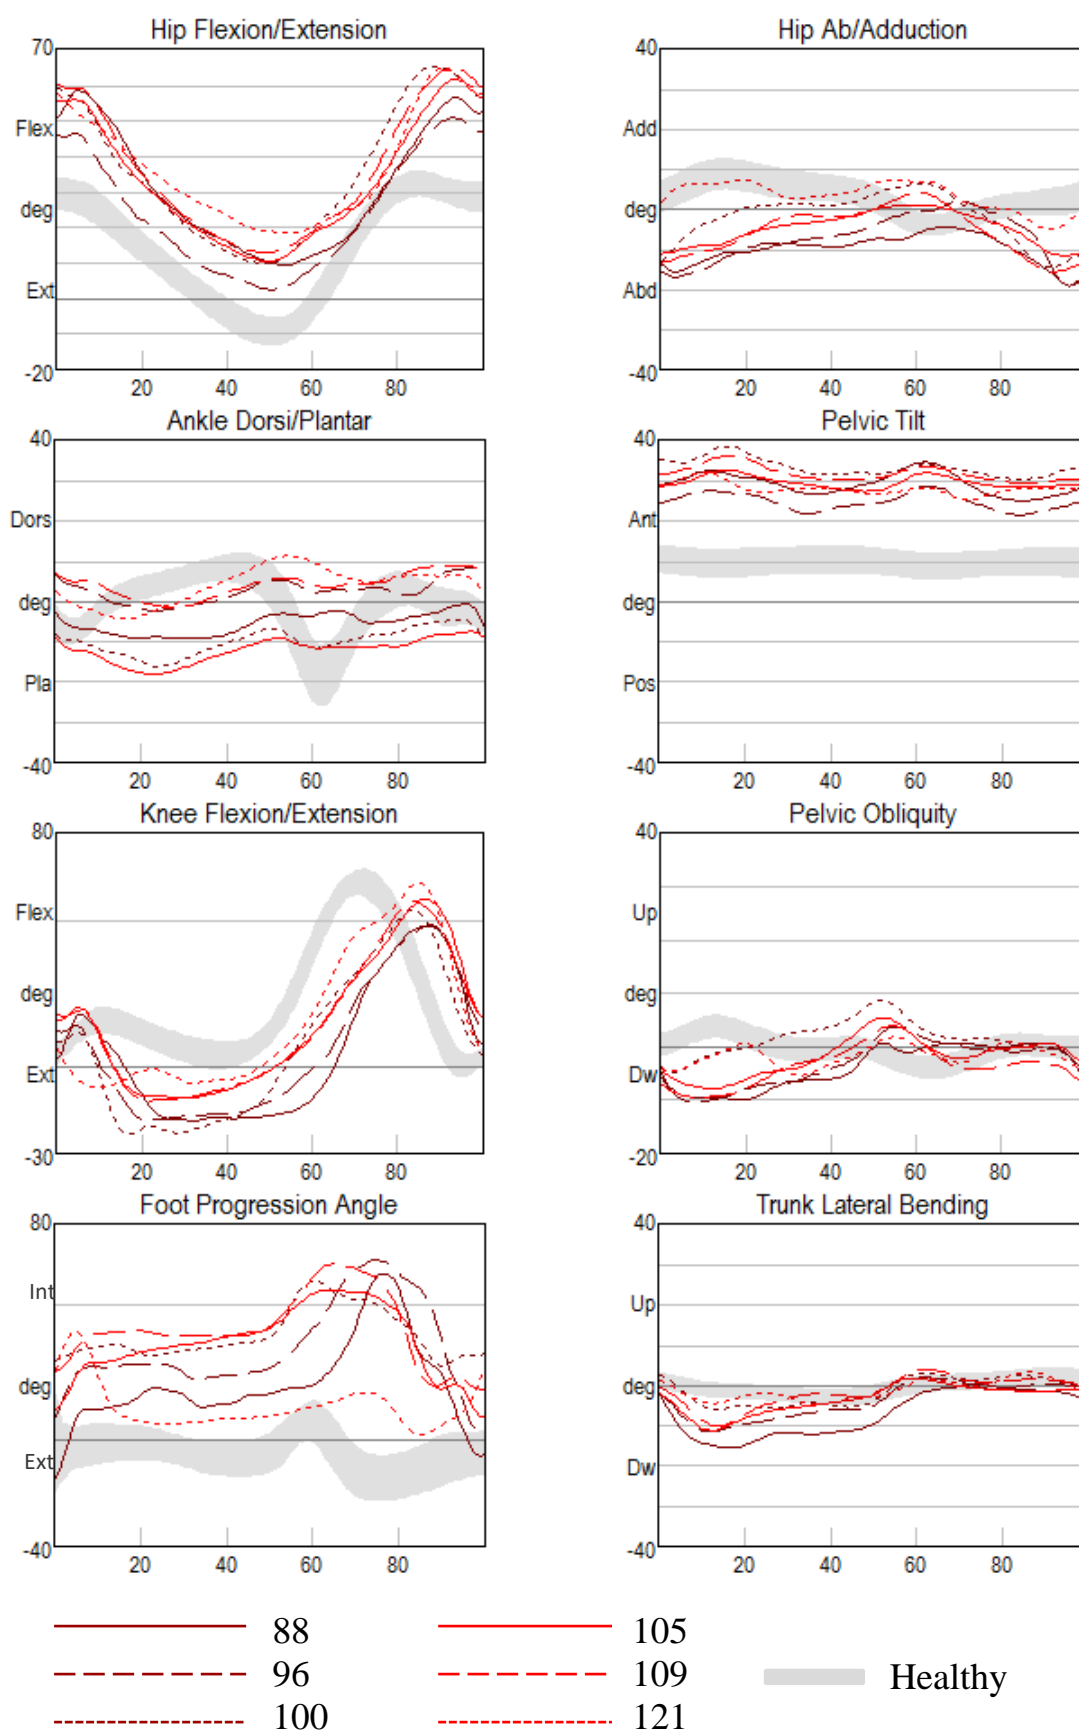

Figure S2. Most significant left kinematics, with orthoses and walker, recorded at 88, 96, 100, 105, 109, 121 months of age.

Supplement: s1 [file s1]

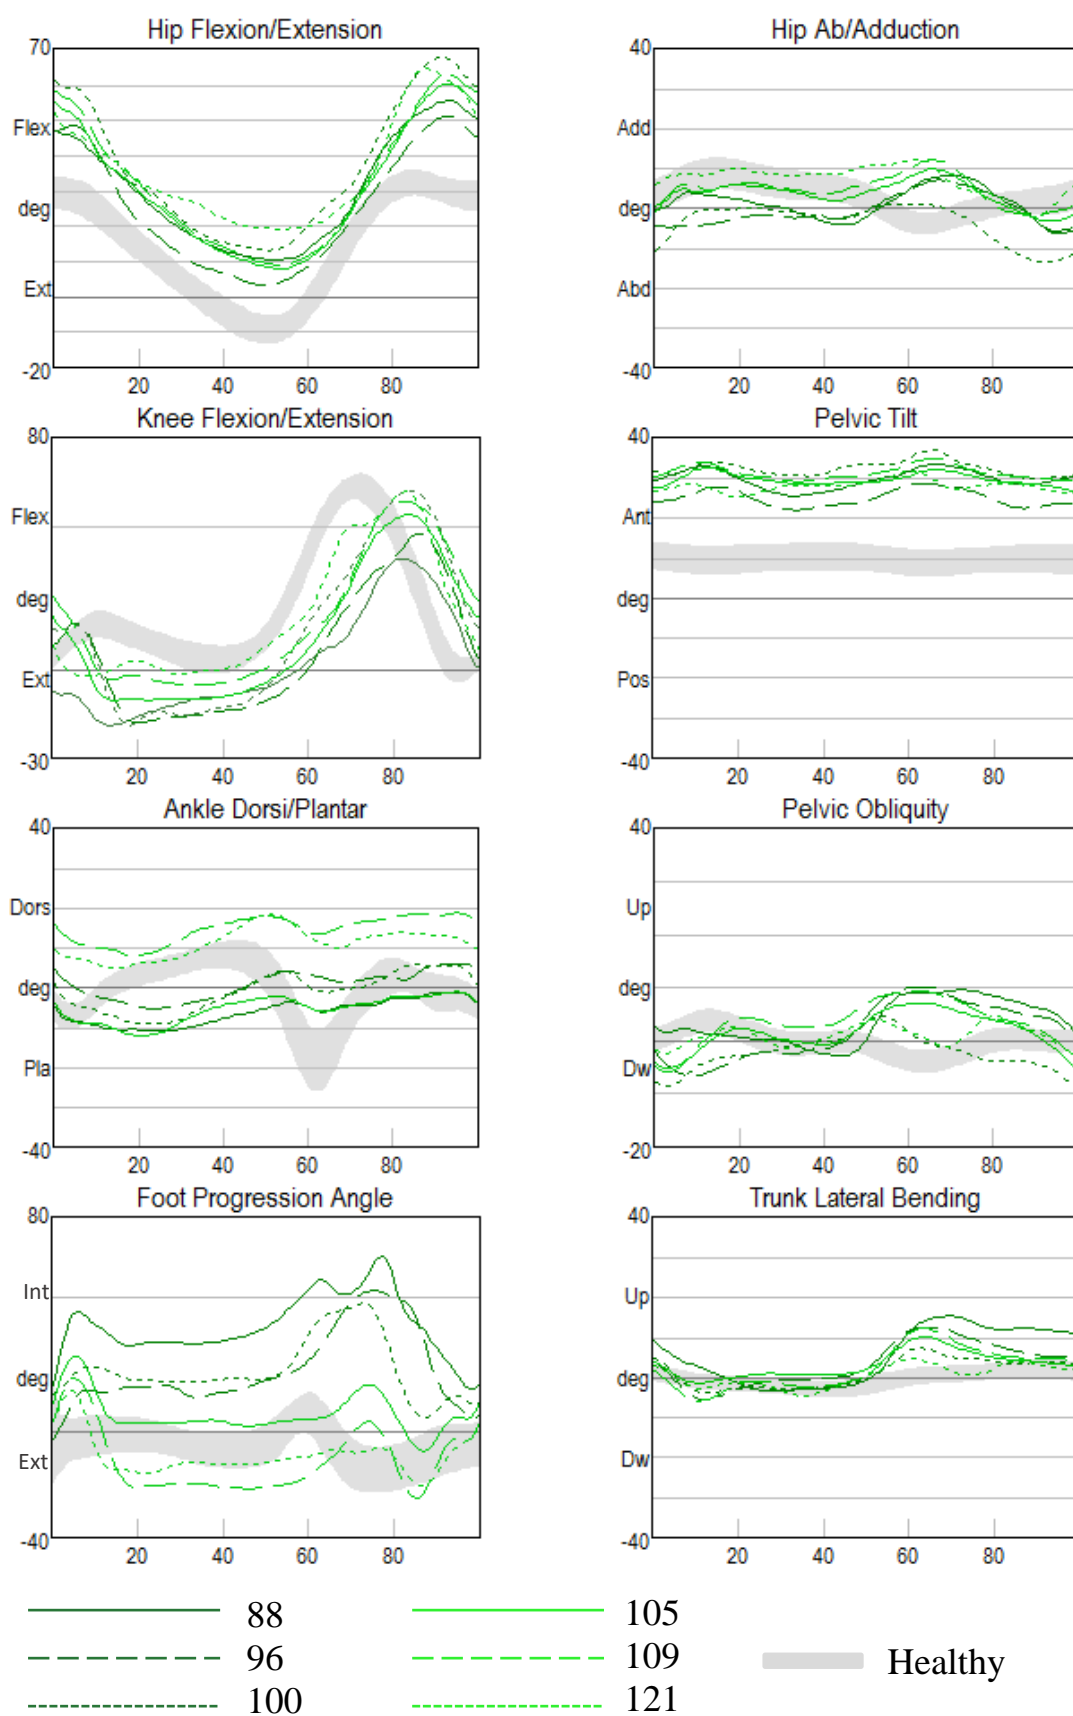

Figure S1. Most significant right kinematics, with orthoses and walker, recorded at 88, 96, 100, 105, 109, 121 months of age.

Supplement: s1 [file s1]
